- 1 **Title:** Tn-Core: context-specific reconstruction of core metabolic models using Tn-seq data
- 2 **Running head:** Tn-Core: Tn-seq and metabolic reconstruction
- 3 **Authors:** George C diCenzo<sup>\*</sup>, Alessio Mengoni, Marco Fondi<sup>1\*</sup>
- 4 **Affiliation:** Department of Biology, University of Florence, 50019, Sesto Fiorentino, FI, Italy
- 5
- 6 \*Correspondence: [georgecolin.dicenzo@unifi.it](mailto:georgecolin.dicenzo@unifi.it), [marco.fondi@unifi.it](mailto:marco.fondi@unifi.it)
- 7

8  
9  
10  
11  
12  
13  
14  
15  
16  
17  
18  
19  
20  
21  
22  
23  
24  
25  
26

## ABSTRACT

**Motivation:** Tn-seq (transposon mutagenesis and sequencing) and constraint-based metabolic modelling represent highly complementary approaches. They can be used to probe the core genetic and metabolic networks underlying a biological process, revealing invaluable information for synthetic biology engineering of microbial cell factories. However, while algorithms exist for integration of –omics data sets with metabolic models, no method has been explicitly developed for integration of Tn-seq data with metabolic reconstructions.

**Results:** We report the development of Tn-Core, a Matlab toolbox designed to generate gene-centric, context-specific core reconstructions consistent with experimental Tn-seq data. Extensions of this algorithm allow: i) the generation of context-specific functional models through integration of both Tn-seq and RNA-seq data; ii) to visualize redundancy in core metabolic processes; and iii) to assist in curation of *de novo* draft metabolic models. The utility of Tn-Core is demonstrated primarily using a *Sinorhizobium meliloti* model as a case study.

**Availability and implementation:** The software can be downloaded from <https://github.com/diCenzo-GC/Tn-Core>. All results presented in this work have been obtained with Tn-Core v. 1.0.

**Contact:** [georgecolin.dicenzo@unifi.it](mailto:georgecolin.dicenzo@unifi.it), [marco.fondi@unifi.it](mailto:marco.fondi@unifi.it)

**Supplementary information:** Supplementary data are available at Bioinformatics online.

## 27 INTRODUCTION

28 The chemical complexity of biological entities hampers a full understanding of life and,  
29 consequently, its characterization is one of the strongest motivations in systems biology.  
30 Constraint-based metabolic modelling (CBMM) [1] is a well-established tool to formally  
31 represent cellular metabolism at the genome-scale level (by means of Genome Scale Metabolic  
32 Reconstructions, GSMRs) and to derive reliable predictions [2]. Despite this approach having  
33 shown remarkable predictive capabilities over the years [3], there are constant efforts aimed at  
34 improving and customizing the procedures of CBMM analyses.

35 It is increasingly recognized that the complexity of modern GSMRs often masks their  
36 utility in various applications [4], and that most studies to date only focus on the core metabolic  
37 pathways of the organism [5, 6]. Furthermore, due to the scaling of computational complexity,  
38 many stoichiometric (e.g. elementary flux modes enumeration [7]) and/or dynamic approaches  
39 (e.g. kinetic modelling [8]) cannot be applied to GSMRs embedding thousands of reactions. As a  
40 result, algorithms have been implemented to reduce a GSMR to a core set of reactions necessary  
41 to produce a pre-defined phenotype(s) [4, 9-11]. These algorithms share a similar overall  
42 approach: they are reaction-centric and require a user-defined list of reactions, metabolites,  
43 and/or phenotypes that must remain in the core model. However, by not directly incorporating  
44 experimental data, the biological accuracy of these core models cannot be guaranteed.

45 As GSMRs generally incorporate as much of the cell's metabolism as possible, regardless  
46 to the activity of the reaction in a given environment, additional constraints are required to  
47 accurately represent environment-specific metabolism. This can be accomplished by constraining  
48 GSMRs with -omics data sets. This most commonly involves integrating gene expression data,  
49 constraining the allowable flux across each reaction based on the expression level(s) of the

50 corresponding gene(s) [12, 13]. Similarly, tools exist for combining GSMRs with proteomics  
51 [14], fluxomics [15], and metabolomics data [16]. Ultimately, these applications have a common  
52 goal: reducing a GSMR to a smaller model with only the reactions active in the specific  
53 condition.

54 High-throughput transposon mutagenesis and sequencing (Tn-seq) generates a genome-  
55 wide list of genes essential in a given environment [17]. Arguably, these data sets are the best  
56 experimental representation of which reactions are active in a given environmental condition.  
57 Combining core metabolic networks and Tn-seq can allow deep functional refinement of GSMRs  
58 to account for only those (core) reactions and genes active under the tested conditions.. From a  
59 synthetic biology viewpoint, the central metabolism of an organism is of paramount importance  
60 as it i) produces the precursors for all natural chemicals and ii) has a high capacity of pathway  
61 fluxes; as such, central metabolism can be exploited as a chassis for production of industrially  
62 important molecules [18, 19]. Consequently, a Tn-seq curated core metabolic model is of high  
63 value for synthetic biology attempts at engineering designing cell factories. Indeed, genome  
64 streamlining, i.e., the construction of cells with minimal genomes, is known to generate cells  
65 with improved biotechnological properties, including increased protein or metabolite production  
66 [20-24]. However, despite the highly complementary nature of Tn-seq and CBMM, we are  
67 unaware of a tool for generating context-specific models through the automated incorporation of  
68 Tn-seq data with GSMRs.

69 Here, we report the development of Tn-Core, a MATLAB toolbox for use with COBRA  
70 formatted metabolic models. Tn-Core is designed for the generation of gene-centric, context-  
71 specific core metabolic models consistent with experimental gene fitness data produced through  
72 Tn-seq experiments, or through both Tn-seq and RNA-seq data. Tn-Core can further be used to:

73 i) evaluate potential redundancy in core metabolism (does not require Tn-seq data); ii) identify  
74 which of the alternate pathway(s) contributes to higher flux through the objective function; and  
75 iii) perform Tn-seq-guided refinement of the Gene-Protein-Reaction rules (GPRs) in a GSMR.

76

77

## IMPLEMENTATION

78 Tn-Core was developed to facilitate the generation of context-specific core metabolic  
79 models through the integration Tn-seq data, then expanded to further allow the integration of  
80 RNA-seq data and to examine core metabolic redundancy in the presence or absence of these  
81 data. The toolbox is written in Matlab and uses COBRA formatted models and the COBRA  
82 Toolbox [25]. Tn-Core is available as Supplementary Materials S1, and the current and future  
83 versions will be available through GitHub (<https://github.com/diCenzo-GC/Tn-Core>). The  
84 functionality of the entire toolbox has been validated on four machines, running three versions of  
85 Matlab (R2015b, R2016b, R2017a) and three distinct COBRA toolbox setups (openCOBRA  
86 downloaded between 12/2016 and 08/2017), suggesting that Tn-Core should work in a broad  
87 range of computing environments.

### 88 **Generation of core metabolic models.**

89 The pseudocode for Tn-Core is given in Algorithm 1, the main workflow is depicted in the  
90 flowchart of Figure 1, and a detailed manual describing its usage is provided in Supplementary  
91 Materials S1. The minimum input is a COBRA-formatted metabolic model. Optionally, the user  
92 may provide: (i) Tn-seq data for all genes in the genome; (ii) RNA-seq data for all genes in the  
93 genome, and/or (iii) a list of pre-determined core/essential genes. Tn-Core begins with the  
94 optional step (Figure 1a) of producing a list of model genes to be protected during the generation  
95 of

96 **Algorithm 1.** The Tn-Core algorithm

97 **Input:**  $n$  is the number of iterations;  $model$  is the initial GSMR. **Other variables and lists:**  $G_m$  is the list of genes in

98  $model$ ,  $T$  is the Tn-seq data,  $L$  is the RNA-seq data,  $M_i$  is the final array of core metabolic reconstructions,  $t$  is the

99 threshold for objective function. **Functions:**  $detectDeadEnds$ ,  $deleteModelGene$ ,  $findRxnsFromMets$ ,

100  $singleGeneDeletion$ , and  $optimizeCbModel$  are part of the COBRA Toolbox. All the other functions are

101 implemented as Matlab code (see Supplementary Material S1).

102 **1:**  $D = detectDeadEnds(model)$

103 **2:**  $R_D = findRxnsFromMets(D)$

104 **3:**  $m_{red} = \text{remove reactions and unused genes}(model, R_D)$

105 **4:**  $E_{model} = singleGeneDeletion(model)$

106 **5:**  $(E, S, W) = \text{get essential, strong, and weak growth promoting Genes}(T)$

107 **6:**  $L_H = \text{get highly expressed genes}(L)$

108 **7:**  $U_m = (G_m \sim ((E \cap G_m) \cup E_{model} \cup (L_H \cap G_m)))$

109 **8:** for  $i = 1$  to  $n$

110 **9:**  $m = m_{red}$

111 **10:**  $U_m^* = \text{shuffle}(U_m)$

112 **11:** for  $j = 1$  to  $\text{length}(U_m^*)$

113 **12:**  $m' = deleteModelGene(m, U_m^*(j))$

114 **13:**  $\varphi = optimizeCbModel(m')$

115 **14:** if  $\varphi > t$

116 **15:**  $m = m'$

117 **16:** end if

118 **17:** end for

119 **18:**  $M(i) = m$

120 **19:**  $G_{M(i)} = \text{get the genes in } M(i)$

121 **20:**  $O(i) = optimizeCbModel(M(i))$

122 **21:**  $\{N_E(i); N_S(i); N_W(i)\} = \{\text{length}(G_{M(i)} \cap E); \text{length}(G_{M(i)} \cap S); \text{length}(G_{M(i)} \cap W)\}$

123 **22:** end for

124 **23:**  $M_{core} = M(\max(N_E))$

125 **24:** if  $\text{length}(M_{core}) > 1$

126 **25:**  $M_{core} = M_{core}(\max(N_S))$

127 **26:**  $M_{core} = M_{core}(\max(N_W))$

128 **27:**  $M_{core} = M_{core}(\max(O))$

129 **28:** end if

130 **29:** return  $M_{core}$

131 random core models. This list is based on: (i) all user-defined core genes, (ii) highly expressed  
132 genes if RNA-seq are provided, and (iii) essential genes based on Tn-seq data (optional even if  
133 Tn-seq data are provided). Next, Tn-Core produces a reduced GSMR by iteratively removing all  
134 reactions that produce dead-end metabolites (and associated genes, if they are not in the GPR of  
135 another reaction). Additionally, all GPRs not assigned to a coding sequence (e.g. gap-filling  
136 reactions) are removed. As the order in which reactions are added/removed from a model might  
137 alter the predictive capability of the reconstruction, randomized core models ( $M$ , Algorithm 1)  
138 are then generated from the reduced model (Figure 1b). Importantly, this step can be parallelized,  
139 reducing the running time. This involves first preparing a list of all non-protected model genes  
140 ( $U_m$ ), and randomly shuffling their order at each iteration ( $U_m^*$ ). All genes (and corresponding  
141 reactions) from each shuffled set are individually deleted from the model and growth is tested. If  
142 the objective function flux ( $\varphi$ ) stays above the threshold ( $t$ ), the gene is excluded from the model;  
143 otherwise, the gene is put back to the model. The result is a population of models ( $M$ ) each  
144 containing the initially protected genes (optional), and a minimal amount of additional genes  
145 required to maintain objective function flux  $\varphi$  above the threshold  $t$ . If Tn-seq data is provided,  
146 the objective function flux of each core model is recorded, genes are classified into four  
147 categories from ‘essential’ to ‘non-essential’ based on the Tn-seq data (Figure S1), and the  
148 number of core model genes in each category is recorded (Figure 1c).

149 Finally, the core reconstruction that maximizes the number of essential Tn-seq genes is  
150 chosen as the reconstruction most consistent with the Tn-seq data ( $M_{core}$ ). If two or more models  
151 embed the same number of essential genes, the reconstruction maximizing the number of ‘strong  
152 growth promoting’ and then ‘weak growth promoting’ genes is selected as the output. If multiple  
153 models still remain, the model with the highest objective reaction flux is returned as the core

154 metabolic model most consistent with the gene essentiality data (Figure 1d). Independently, the  
155 core model with the highest objective function flux is returned as the fastest growing core model  
156 (Figure 1d); if multiple models have the same maximal objective function flux, the model most  
157 consistent with the gene essentiality data is chosen. In some cases, it may be desirable to obtain  
158 other core models produced during the running of Tn-Core, such as the slowest growing core  
159 model. The output of Tn-Core additionally includes a cell array of the objective function flux for  
160 all produced core models, as well as a binary presence/absence cell array indicating which genes  
161 are included in each of the core models. By using the latter cell array with the *tncore\_reconstruct*  
162 function, it is possible to rebuild any of the core models produced during the running of Tn-Core.  
163 **Analysis of variation across the core metabolic models.**

164 The redundancy embedded within GSMRs means that each of the models in the core  
165 model population may contain a different set of genes and/or reactions. Tn-Core includes  
166 functions to explore this redundancy, whether Tn-seq data is provided or not (Figure 1e). Two or  
167 three primary matrixes are returned, and can display either gene or reaction information. A  
168 binary presence/absence matrix is given, which indicates, for each model, whether each feature is  
169 present or absent; only features embedded in at least one core model are included (Figure 2a, 2b).  
170 A co-occurrence matrix is also provided; for each feature variably present in the core model  
171 population, a Chi-squared statistics is reported to indicate which feature pairs are more likely  
172 than chance to appear, or not appear, in the same core models (Figure 2c-2e). If the core models  
173 are generated multiple times, for example, using different objective flux thresholds, a matrix can  
174 be produced that indicates, for each population of core models, what percentage of models  
175 contains each of the features (Figure 2f, 2g).  
176



## 177 **Refinement of genome-scale metabolic network reconstructions.**

178           Finally, an extension is provided to use Tn-seq data to assist in the automated curation of  
179 GSMRs (Figure 1f). First, Tn-seq essential genes are determined, and these genes are protected  
180 during core model generation. The core model most consistent with the Tn-seq data is collected,  
181 and where appropriate, ‘or’ statements in the GPRs are replaced with ‘and’ statements; if any Tn-  
182 seq essential genes in the model have no effect when deleted, and if any occur in the same  
183 reaction(s) and only the same reaction(s), and the GPR currently lacks an ‘and’ statement, the  
184 ‘or’ statements of the GPR are replaced with ‘and’ statements. The implementation of this  
185 section of the code is rather strict in order to avoid artificially converting non-essential genes to  
186 essential genes. Finally, for any core model reaction with a Tn-seq essential gene, the  
187 corresponding GPRs of the original GSMR are replaced with those of the core reconstruction.

188

## 189 **RESULTS AND DISCUSSION**

### 190 **Validation of Tn-Core.**

191           Tn-Core was validated by extracting context-specific core models from the  
192 *Sinorhizobium meliloti* iGD1575 GSMR [26]. Two core models were produced, each using a  
193 growth threshold of 50% the full model, with 50,000 iterations, and with Tn-seq essential genes  
194 pre-identified. In one Tn-Core run, only Tn-seq data [27] was used; in the second run, the same  
195 Tn-seq data plus RNA-seq data [28] was included. The sizes of both models are summarized in  
196 Table 1, and the inclusion of RNA-seq data resulted in a somewhat larger core model.

197           The ability of the core models to capture context-specific core metabolism was examined  
198 by predicting the essentiality of central carbon metabolic genes (Figure 3). Results were  
199 compared to both the full iGD1575 model and to the manually constructed *S. meliloti* iGD726

200 core metabolic reconstruction [27]. The entire set of central carbon metabolic pathways was  
201 predicted to be non-essential in iGD1575 presumably due to network redundancy. In contrast,  
202 most of central carbon metabolism was essential in the manually prepared iGD726 core model  
203 (*gnd* and *tal* are correctly predicted as non-essential). Using only Tn-seq data, Tn-Core extracted  
204 a core model largely consistent with iGD726, although the ATP synthase pump was missing.  
205 However, by also including RNA-seq data in the pipeline, the extracted core model even better  
206 reflected context-specific metabolism. This is highlighted by the lower half of the Embden-  
207 Meyerhof-Parnas pathway. In particular, mutation of *pgk* was experimentally shown to result  
208 in a 40% growth rate decrease when grown with glucose [29]. Whereas *pgk* was essential in the  
209 first core model, deletion of *pgk* in the core model extracted using Tn-seq and RNA-seq data  
210 resulted in a growth rate decrease of 30%. Taken together, these results demonstrate the ability  
211 of Tn-Core to produce highly accurate context-specific core metabolic models, and illustrates  
212 how integrating both Tn-seq and RNA-seq data sets can lead to high precision fitness  
213 predictions.

214 We subsequently implemented in Tn-Core the option to employ the Minimization of  
215 Metabolic Optimization (MOMA) algorithm during core model generation instead of FBA.  
216 Using MOMA instead of FBA is significantly slower, had little effect on the size of the core  
217 models (Table 1), and, at least in central carbon metabolism (Figure 3), did not produce more  
218 accurate core reconstructions. We have also found that the core models returned when using the  
219 MOMA implementation are not guaranteed to grow. This appears to be due to certain core  
220 models growing when using the *MOMA* function of the COBRA toolbox, but not growing when  
221 using the *optimizeCbModel* function of the COBRA toolbox. We therefore suggest that the FBA  
222 implementation should be used for most purposes.

223 The functionality of Tn-Core was further confirmed using the *Pseudomonas aeruginosa*  
224 iPae1146 GSMR [30] and published Tn-seq data [31]. These results are reported in  
225 Supplementary Material S2.

## 226 **Benchmarking of Tn-Core.**

227 There is currently no tool explicitly comparable to Tn-Core as none consider  
228 experimental Tn-seq data during core model identification. Nevertheless, we compared Tn-Core  
229 to two algorithms design for the extraction of core reconstructions: FASTCORE [10] and  
230 minNW [11]. Both algorithms are reaction-centric, and require as input a set of reactions, not  
231 genes, to be protected in the output model. To adapt these algorithms for use with Tn-seq data,  
232 we set the protected reactions as those reactions that are constrained upon deletion of the Tn-seq  
233 essential genes. Additionally, in both cases, a consistent model derived from iGD1575, generated  
234 with FASTCC [10], was used as the starting model. For both FASTCORE and minNW, the  
235 output models had similar or fewer reactions and metabolites, but a larger complement of genes,  
236 than the models produced with Tn-Core (Table 1), which is related to its reaction-centric nature.  
237 More importantly, although faster than Tn-Core, the accuracy of FASTCORE and minNW was  
238 far exceeded by Tn-Core using central carbon metabolism as a proxy (Figure 3). This result  
239 validates that Tn-Core fulfills a function that is currently lacking among the available algorithms.

240 The output of Tn-Core was also compared to the gene-centric TIGER implementation of  
241 the GIMME algorithm [32, 33]. GIMME generates context-specific models based on expression  
242 data, and is therefore not directly comparable to Tn-Core that primarily uses essentiality data.  
243 GIMME initially failed to return a functional model using iGD1575 and the provided RNA-seq  
244 data, but a working model could be recovered using a custom extension (see Supplementary File  
245 S2). Overall, the models returned by GIMME and Tn-Core displayed high consistency, with the

246 central carbon metabolism extracted by GIMME of similar accuracy to those extracted by Tn-  
247 Core (Figure 3). Additionally, the GIMME model and Tn-Core model produced with Tn-seq and  
248 RNA-seq data (FBA implementation) share > 87% of their genes. Thus, at least in *S. meliloti*  
249 where essential genes tend to be highly expressed [27], both Tn-Core and GIMME perform  
250 similarly and the choice of algorithm would be driven primarily by the type of data being  
251 incorporated with the GSMR.

### 252 **Tn-Core performance.**

253 In order for Tn-Core to be accurate, a sufficiently large population of core models must  
254 be generated to ensure the optimal core model is represented. There are therefore two primary  
255 factors contributing to the speed of Tn-Core: (i) running time per iteration (i.e., per core model  
256 produced), and (ii) the number of iterations. To test the effect of starting model and parameter  
257 settings on the performance of Tn-Core, we generated 25,000 core models for five different  
258 GSMRs with varying parameter settings. A summary of these runs are provided in Table 2, and a  
259 detailed description of is reported in Supplementary File S2. 25,000 iterations did not guarantee  
260 the presence of all possible core models in any of the runs. However, the number of variably  
261 present genes gives an indication of the number of iterations required to cover all possibilities;  
262 the square of the variably present genes represents the theoretical maximum number of  
263 genetically unique core models. Considering that the variability among core models is highly  
264 dependent on the starting GSMR and the parameter settings, we recommend users first perform a  
265 test run of 10,000 iterations, and use the gene variability to approximate how many iterations  
266 must be performed. Additionally, if Tn-Core is being used to produce a core model and not only  
267 to explore redundancies in the core network, we recommend setting Tn-Core to pre-determine

268 the essential genes prior to core model generation and to use a growth threshold of at least 50%.

### 269 **Characterization of redundancy and growth promoting pathways with Tn-Core.**

270 As is evident from Table 2, significant redundancy can exist in core metabolic pathways.

271 Tn-Core produces a series of matrixes to summarize this variability (Figure 2), which can be  
272 easily imported into graphing tools to visualize the data (e.g. [34]). Here, we briefly illustrate the  
273 usefulness of these matrixes in uncovering biologically interesting data. We note that the same  
274 trends were observed for *S. meliloti* using the FBA (Figure 2) or MOMA (Figure S2)  
275 implementation, and also when using GSMRs for *Escherichia coli*, *P. aeruginosa*, *Pseudomonas*  
276 *haloplanktis*, and *Acinetobacter baumannii* (Figures S3-S6), demonstrating that these results are  
277 not specific to a single model (Figure S6).

278 Gene/reaction presence matrixes (Figures 2a, 2b) provide an overview of the variability  
279 of the models. In the case of *S. meliloti*, the core models contain an average of 434 genes, of  
280 which 286 genes (~ 66%) are invariably present and the rest are from a set of 777 variably  
281 present genes. In other words, a third of core *S. meliloti* metabolic genes can be functionally  
282 replaced by alternative genes or pathways, consistent with recent experimental work [27]. The  
283 variable and invariable core genes were mapped to KEGG pathways [35] using eggNOG-mapper  
284 [36] to identify functional biases. Significant redundancy was observed in a diversity of  
285 pathways, including carbon, amino acid and nucleotide metabolism. In contrast, the most  
286 fundamental cellular processes appeared to lack redundancy, such as transcription, translation,  
287 and aminoacyl-tRNA biosynthesis.

288 Gene/reaction co-occurrence matrixes summarize the frequency that two genes or  
289 reactions occur in the same model relative to chance (Figures 2c-2d). This can identify modules  
290 that work together (likely to co-occur), and genes or biochemical pathways that are functionally

291 redundant (unlikely to co-occur). For all GSMRs used in this work, clear modules and redundant  
292 genes/pathways could be observed in the matrixes (Figure 2, Figures S2-S6). Known  
293 redundancies could be detected in the *S. meliloti* iGD1575 reaction co-occurrence matrix. For  
294 example, the two pathways for L-proline biosynthesis [37] were unlikely to occur in the same  
295 model, as were thiamine transport and thiamine biosynthesis. These observations confirm that  
296 these matrixes could be useful in detecting metabolic redundancy in core bacterial metabolism.

297 Finally, core models were generated using growth thresholds of 10% and 99% (of the  
298 original objective function flux), and a scatterplot was used to compare the frequency of each  
299 gene/reaction in the resulting core model populations (Figures 2f, 2g). In all cases, some  
300 genes/reactions were found to be enriched in one of the two core model populations, and the use  
301 of the MOMA algorithm increased the incidence of such genes/reactions (Figures 2 and S2).  
302 When using the FBA algorithm, biases in the occurrence of genes in the two core model  
303 populations were particularly prevalent in the *E. coli* iJO1366 model (Figure S5). Intriguingly,  
304 some genes, such as *b2417* (glucose-specific enzyme IIA component of PTS, glycolysis), *b2342*  
305 and *b3845* (both acetyl-CoA acyltransferase, fatty acid degradation), were ~ 5-fold more  
306 prevalent in the core models generated with a 99% growth threshold compared to a 10% growth  
307 threshold (differences statistically significant based on Fisher exact tests, p-value < 2.2e-16).  
308 Yet, despite the importance of the pathways these genes are involved in, none of them had a  
309 predicted effect on growth rate when deleted in the full iJO1366 model (using either FBA or  
310 MOMA), likely due to the redundancy in the complete GSMR. Hence, Tn-Core may facilitate  
311 the identification of genes contributing to optimal growth in core metabolic networks, including  
312 genes not readily detected as important in the full GSMR.

313

314

### 315 **Refinement of GSMRs using Tn-Core.**

316 Automated metabolic network reconstruction methods are expected to incorrectly assign  
317 multiple genes to the same core metabolic reaction. In the absence of experimental data, it can be  
318 difficult to correct such errors. We therefore implemented a function for using Tn-Core to assist  
319 in model refinement using Tn-seq data. We tested this pipeline using the *S. meliloti* iGD1575  
320 model, as well as with a draft *S. meliloti* model prepared using the Kbase automated  
321 reconstruction pipeline. This process resulted in the modification of the GPRs of 60 reactions in  
322 iGD1575, with 69 genes removed from the model. Similarly, 107 GPRs (over 6% of reactions)  
323 were modified in the draft model following this process, with 57 genes deleted from the model.  
324 These results demonstrate that Tn-seq data and Tn-Core can play a valuable role in curation of  
325 metabolic models, although it certainly does not replace the need of an accurate manual curation.

326

327

## **CONCLUSIONS**

328 Here, we presented Tn-Core, a new tool for the generation of core metabolic network  
329 reconstructions. The unique feature of Tn-Core is the ability to consider experimental Tn-seq  
330 data, as well as both Tn-seq and RNA-seq data, for producing a core model that best represents  
331 the true metabolism of the cell in a given physiological condition. Despite that this pipeline may  
332 run slower than existing algorithms for the generation of core or context-specific models, Tn-  
333 Core remains advantageous due to: i) its high accuracy; ii) its ability to consider both functional  
334 genomics (Tn-seq) and transcriptomics data (RNA-seq); iii) its ease of use with little pre-  
335 processing of the data required; and iv) its gene-centric approach.

336

337

338

## METHODS

339

340

341

342

343

344

345

346

347

348

349

350

351

352

353

354

355

356

357

358

359

All data generated with Tn-Core (except for the timing of Table 2) was done using Matlab 2016a (Mathworks), the COBRA Toolbox (downloaded December 9, 2016 from the openCOBRA repository) [25], and using the Gurobi 6 solver (gurobi.com), SBMLToolbox 4.1.0 [38], and libSBML 5.11.8 [39]. All other computations were performed in Matlab 2017a using the Gurobi 7.0.2 solver, SBMLToolbox 4.1.0, libSBML 5.15.0, scripts from the COBRA Toolbox (downloaded May 12, 2017 from the openCOBRA repository), and the TIGER Toolbox v.1.2.0-beta [33]. For running minNW, the iLOG CPLEX Studio 12.7.1 solver (ibm.com) was used. Gene essentiality was determined using the *singleGeneDeletion* function and the MOMA algorithm. In order to ensure that core model generation with Tn-Core did not occasionally fail when using the MOMA algorithm, the MOMA.m script of the COBRA Toolbox was modified at line 216 to to treat unbounded solutions the same as infeasible solutions. Additionally, the solveCobraQP.m script of the COBRA Toolbox was modified to work with the Gurobi 6 solver. Detailed usage, and modifications, of FASTCORE [10], minNW [11], and GIMME [32, 33] are provided in Supplementary Materials S2.

The *S. meliloti* iGD1575 [26], *P. haloplanktis* iMF721 [40], *A. baumannii* iLP844 [41], *E. coli* iJO1366 [42], and *P. aeruginosa* iPae1146 [30] models were previously published. Prior to using iLP844, the genes ‘Unknown1’ through ‘Unknown160’ were replaced with a single gene called ‘Unknown’. The draft *S. meliloti* GSMR was generated using Kbase (kbase.us) as described in Supplementary Materials S1.

Scripts to repeat all benchmarking, as well as all output data generated in this work, are available at <https://github.com/diCenzo-GC/Tn-Core>. The complete Tn-Core toolbox, together



360 with a reference manual, are provided as Supplementary Materials S1. Tn-Core is also freely  
361 available at <https://github.com/diCenzo-GC/Tn-Core>, and future releases of the toolbox will be  
362 available through the same link.

363

364

## ACKNOWLEDGEMENTS

365 GCD was funded by a Natural Sciences and Engineering Research Council (NSERC) of  
366 Canada Postdoctoral Fellowship.

367

368

## REFERENCES

369 [1] A. Varma, B.O. Palsson, Stoichiometric flux balance models quantitatively predict growth  
370 and metabolic by-product secretion in wild-type *Escherichia coli* W3110, *Appl Environ*  
371 *Microbiol*, 60 (1994) 3724-3731.

372 [2] A. Bordbar, J.M. Monk, Z.A. King, B.O. Palsson, Constraint-based models predict metabolic  
373 and associated cellular functions, *Nature reviews. Genetics*, 15 (2014) 107-120.

374 [3] C.B. Milne, P.J. Kim, J.A. Eddy, N.D. Price, Accomplishments in genome-scale in silico  
375 modeling for industrial and medical biotechnology, *Biotechnology journal*, 4 (2009) 1653-1670.

376 [4] M. Ataman, D.F. Hernandez Gardiol, G. Fengos, V. Hatzimanikatis, redGEM: Systematic  
377 reduction and analysis of genome-scale metabolic reconstructions for development of consistent  
378 core metabolic models, *PLoS computational biology*, 13 (2017) e1005444.

379 [5] K.C. Soh, L. Miskovic, V. Hatzimanikatis, From network models to network responses:  
380 integration of thermodynamic and kinetic properties of yeast genome-scale metabolic networks,  
381 *FEMS yeast research*, 12 (2012) 129-143.

- 382 [6] M.T. Alam, M.H. Medema, E. Takano, R. Breitling, Comparative genome-scale metabolic  
383 modeling of actinomycetes: the topology of essential core metabolism, *FEBS letters*, 585 (2011)  
384 2389-2394.
- 385 [7] C.T. Trinh, A. Wlaschin, F. Sreenc, Elementary mode analysis: a useful metabolic pathway  
386 analysis tool for characterizing cellular metabolism, *Applied microbiology and biotechnology*,  
387 81 (2009) 813-826.
- 388 [8] N. Jahan, K. Maeda, Y. Matsuoka, Y. Sugimoto, H. Kurata, Development of an accurate  
389 kinetic model for the central carbon metabolism of *Escherichia coli*, *Microbial cell factories*, 15  
390 (2016) 112.
- 391 [9] P. Erdrich, R. Steuer, S. Klamt, An algorithm for the reduction of genome-scale metabolic  
392 network models to meaningful core models, *BMC systems biology*, 9 (2015) 48.
- 393 [10] N. Vlassis, M.P. Pacheco, T. Sauter, Fast reconstruction of compact context-specific  
394 metabolic network models, *PLoS computational biology*, 10 (2014) e1003424.
- 395 [11] A. Rohl, A. Bockmayr, A mixed-integer linear programming approach to the reduction of  
396 genome-scale metabolic networks, *BMC bioinformatics*, 18 (2017) 2.
- 397 [12] A.S. Blazier, J.A. Papin, Integration of expression data in genome-scale metabolic network  
398 reconstructions, *Frontiers in physiology*, 3 (2012) 299.
- 399 [13] D. Machado, M. Herrgard, Systematic evaluation of methods for integration of  
400 transcriptomic data into constraint-based models of metabolism, *PLoS computational biology*, 10  
401 (2014) e1003580.
- 402 [14] R. Grosseholz, C.C. Koh, N. Veith, T. Fiedler, M. Strauss, B. Olivier, B.C. Collins, O.T.  
403 Schubert, F. Bergmann, B. Kreikemeyer, R. Aebersold, U. Kummer, Integrating highly

404 quantitative proteomics and genome-scale metabolic modeling to study pH adaptation in the  
405 human pathogen *Enterococcus faecalis*, *NPJ systems biology and applications*, 2 (2016) 16017.

406 [15] N. Zamboni, E. Fischer, U. Sauer, *FiatFlux--a software for metabolic flux analysis from*  
407 *<sup>13</sup>C-glucose experiments*, *BMC bioinformatics*, 6 (2005) 209.

408 [16] K. Yizhak, T. Benyamini, W. Liebermeister, E. Ruppın, T. Shlomi, *Integrating quantitative*  
409 *proteomics and metabolomics with a genome-scale metabolic network model*, *Bioinformatics*, 26  
410 (2010) i255-260.

411 [17] M.C. Chao, S. Abel, B.M. Davis, M.K. Waldor, *The design and analysis of transposon*  
412 *insertion sequencing experiments*, *Nature reviews. Microbiology*, 14 (2016) 119-128.

413 [18] P. Jouhten, *Metabolic modelling in the development of cell factories by synthetic biology,*  
414 *Computational and structural biotechnology journal*, 3 (2012) e201210009.

415 [19] J. Nielsen, *It is all about metabolic fluxes*, *Journal of bacteriology*, 185 (2003) 7031-7035.

416 [20] M. Juhas, D.R. Reuss, B. Zhu, F.M. Commichau, *Bacillus subtilis and Escherichia coli*  
417 *essential genes and minimal cell factories after one decade of genome engineering,*  
418 *Microbiology*, 160 (2014) 2341-2351.

419 [21] S. Lieder, P.I. Nikel, V. de Lorenzo, R. Takors, *Genome reduction boosts heterologous gene*  
420 *expression in Pseudomonas putida*, *Microbial cell factories*, 14 (2015) 23.

421 [22] Y. Li, X. Zhu, X. Zhang, J. Fu, Z. Wang, T. Chen, X. Zhao, *Characterization of genome-*  
422 *reduced Bacillus subtilis strains and their application for the production of guanosine and*  
423 *thymidine*, *Microbial cell factories*, 15 (2016) 94.

424 [23] D. Zhu, Y. Fu, F. Liu, H. Xu, P.E. Saris, M. Qiao, *Enhanced heterologous protein*  
425 *productivity by genome reduction in Lactococcus lactis NZ9000*, *Microbial cell factories*, 16  
426 (2017) 1.

- 427 [24] J.H. Lee, B.H. Sung, M.S. Kim, F.R. Blattner, B.H. Yoon, J.H. Kim, S.C. Kim, Metabolic  
428 engineering of a reduced-genome strain of *Escherichia coli* for L-threonine production,  
429 *Microbial cell factories*, 8 (2009) 2.
- 430 [25] J. Schellenberger, R. Que, R.M. Fleming, I. Thiele, J.D. Orth, A.M. Feist, D.C. Zielinski, A.  
431 Bordbar, N.E. Lewis, S. Rahmanian, J. Kang, D.R. Hyduke, B.O. Palsson, Quantitative  
432 prediction of cellular metabolism with constraint-based models: the COBRA Toolbox v2.0,  
433 *Nature protocols*, 6 (2011) 1290-1307.
- 434 [26] G.C. diCenzo, A. Checcucci, M. Bazzicalupo, A. Mengoni, C. Viti, L. Dziewit, T.M. Finan,  
435 M. Galardini, M. Fondi, Metabolic modelling reveals the specialization of secondary replicons  
436 for niche adaptation in *Sinorhizobium meliloti*, *Nature communications*, 7 (2016) 12219.
- 437 [27] G.C. diCenzo, A.B. Benedict, M. Fondi, G.C. Walker, T.M. Finan, A. Mengoni, J.S.  
438 Griffiths, Robustness encoded across essential and accessory replicons in an ecologically  
439 versatile bacterium, *bioRxiv*, (2017).
- 440 [28] G.C. diCenzo, Z. Muhammed, M. Osteras, S.A.P. O'Brien, T.M. Finan, A Key Regulator of  
441 the Glycolytic and Gluconeogenic Central Metabolic Pathways in *Sinorhizobium meliloti*,  
442 *Genetics*, (2017).
- 443 [29] G.C. diCenzo, T.M. Finan, Genetic redundancy is prevalent within the 6.7 Mb  
444 *Sinorhizobium meliloti* genome, *Molecular genetics and genomics : MGG*, 290 (2015) 1345-  
445 1356.
- 446 [30] J.A. Bartell, A.S. Blazier, P. Yen, J.C. Thogersen, L. Jelsbak, J.B. Goldberg, J.A. Papin,  
447 Reconstruction of the metabolic network of *Pseudomonas aeruginosa* to interrogate virulence  
448 factor synthesis, *Nature communications*, 8 (2017) 14631.

- 449 [31] K.H. Turner, A.K. Wessel, G.C. Palmer, J.L. Murray, M. Whiteley, Essential genome of  
450 *Pseudomonas aeruginosa* in cystic fibrosis sputum, Proceedings of the National Academy of  
451 Sciences of the United States of America, 112 (2015) 4110-4115.
- 452 [32] T. Shlomi, M.N. Cabili, M.J. Herrgard, B.O. Palsson, E. Rupp, Network-based prediction  
453 of human tissue-specific metabolism, Nature biotechnology, 26 (2008) 1003-1010.
- 454 [33] P.A. Jensen, K.A. Lutz, J.A. Papin, TIGER: Toolbox for integrating genome-scale  
455 metabolic models, expression data, and transcriptional regulatory networks, BMC systems  
456 biology, 5 (2011) 147.
- 457 [34] T. Galili, A. O'Callaghan, J. Sidi, C. Sievert, heatmaply: an R package for creating  
458 interactive cluster heatmaps for online publishing, Bioinformatics, (2017).
- 459 [35] M. Kanehisa, Y. Sato, M. Kawashima, M. Furumichi, M. Tanabe, KEGG as a reference  
460 resource for gene and protein annotation, Nucleic acids research, 44 (2016) D457-462.
- 461 [36] J. Huerta-Cepas, K. Forslund, L.P. Coelho, D. Szklarczyk, L.J. Jensen, C. von Mering, P.  
462 Bork, Fast Genome-Wide Functional Annotation through Orthology Assignment by eggNOG-  
463 Mapper, Molecular biology and evolution, 34 (2017) 2115-2122.
- 464 [37] G.C. diCenzo, M. Zamani, A. Cowie, T.M. Finan, Proline auxotrophy in *Sinorhizobium*  
465 *meliloti* results in a plant-specific symbiotic phenotype, Microbiology, 161 (2015) 2341-2351.
- 466 [38] S.M. Keating, B.J. Bornstein, A. Finney, M. Hucka, SBMLToolbox: an SBML toolbox for  
467 MATLAB users, Bioinformatics, 22 (2006) 1275-1277.
- 468 [39] B.J. Bornstein, S.M. Keating, A. Jouraku, M. Hucka, LibSBML: an API library for SBML,  
469 Bioinformatics, 24 (2008) 880-881.
- 470 [40] M. Fondi, I. Maida, E. Perrin, A. Mellera, S. Mocali, E. Parrilli, M.L. Tutino, P. Lio, R.  
471 Fani, Genome-scale metabolic reconstruction and constraint-based modelling of the Antarctic

472 bacterium *Pseudoalteromonas haloplanktis* TAC125, *Environmental microbiology*, 17 (2015)  
473 751-766.

474 [41] L. Presta, E. Bosi, L. Mansouri, L. Dijkshoorn, R. Fani, M. Fondi, Constraint-based  
475 modeling identifies new putative targets to fight colistin-resistant *A. baumannii* infections,  
476 *Scientific reports*, 7 (2017) 3706.

477 [42] J.D. Orth, T.M. Conrad, J. Na, J.A. Lerman, H. Nam, A.M. Feist, B.O. Palsson, A  
478 comprehensive genome-scale reconstruction of *Escherichia coli* metabolism--2011, *Molecular*  
479 *systems biology*, 7 (2011) 535.

480

481 **Table 1.** Summary of the sizes of the produced core models relative to the parent model  
482 (iGD1575) and the manually prepared core model (iGD726).

| Model                                | Genes | Reactions | Metabolites |
|--------------------------------------|-------|-----------|-------------|
| iGD1575                              | 1577  | 1828      | 1579        |
| iGD726                               | 728   | 681       | 703 *       |
| Core model A (without RNA-seq, FBA)  | 488   | 574       | 578         |
| Core model B (with RNA-seq, FBA)     | 532   | 614       | 601         |
| Core model C (without RNA-seq, MOMA) | 490   | 581       | 584         |
| Core model D (with RNA-seq, MOMA)    | 532   | 602       | 590         |
| FASTCORE                             | 732   | 555       | 544         |
| minNW                                | 650   | 487       | 509         |
| GIMME                                | 546   | 1211 †    | 1165 †      |

483 \* As iGD726 contains an updated biomass with a more complex membrane lipid composition,  
484 this model is expected to have more metabolites than core models produced from iGD1575.

485 † The high number of reactions/metabolites is at least partially due to the presence of the  
486 complete complement of exchange reactions.

487 **Table 2.** Parameters and summary statistics for Tn-Core runs.

| Model    | Gene Count * | Reaction Count * | Metabolite Count * | Growth Thresh | Pre-set EGs | RNA-seq | Method | Unique Gene Sets † | Unique Reaction Sets † | Variable Genes ¥ | Variable Reactions ¥ | Iteration run time (s) ø |
|----------|--------------|------------------|--------------------|---------------|-------------|---------|--------|--------------------|------------------------|------------------|----------------------|--------------------------|
| iGD1575  | 1577 (1130)  | 1828 (920)       | 1579 (710)         | 10            | No          | No      | FBA    | 25,000             | 25,000                 | 777              | 416                  | 26.7                     |
|          |              |                  |                    | 25            | No          | No      | FBA    | 25,000             | 25,000                 | 776              | 417                  | 24.0                     |
|          |              |                  |                    | 50            | No          | No      | FBA    | 25,000             | 25,000                 | 773              | 413                  | 23.8                     |
|          |              |                  |                    | 75            | No          | No      | FBA    | 25,000             | 25,000                 | 773              | 415                  | 23.7                     |
|          |              |                  |                    | 90            | No          | No      | FBA    | 25,000             | 25,000                 | 771              | 412                  | 23.9                     |
|          |              |                  |                    | 99            | No          | No      | FBA    | 25,000             | 25,000                 | 763              | 389                  | 24.1                     |
|          |              |                  |                    | 10            | Yes         | No      | FBA    | 25,000             | 25,000                 | 471              | 296                  | 20.6                     |
|          |              |                  |                    | 10            | No          | Yes     | FBA    | 25,000             | 24,999                 | 399              | 262                  | 18.5                     |
|          |              |                  |                    | 10            | Yes         | Yes     | FBA    | 25,000             | 24,995                 | 265              | 163                  | 17.1                     |
|          |              |                  |                    | 50            | Yes         | No      | FBA    | 25,000             | 25,000                 | 472              | 295                  | 19.6                     |
|          |              |                  |                    | 50            | No          | Yes     | FBA    | 25,000             | 25,000                 | 402              | 265                  | 18.4                     |
|          |              |                  |                    | 50            | Yes         | Yes     | FBA    | 25,000             | 24,995                 | 292              | 192                  | 17.3                     |
|          |              |                  |                    | 10            | No          | No      | MOMA   | 25,000             | 25,000                 | 837              | 456                  | 79.7                     |
|          |              |                  |                    | 50            | No          | No      | MOMA   | 25,000             | 25,000                 | 837              | 455                  | 79.9                     |
|          |              |                  |                    | 99            | No          | No      | MOMA   | 25,000             | 25,000                 | 773              | 384                  | 76.6                     |
|          |              |                  |                    | 50            | Yes         | No      | MOMA   | 25,000             | 25,000                 | 531              | 328                  | 64.6                     |
| 50       | Yes          | Yes              | MOMA               | 25,000        | 24,999      | 389     | 280    | 58.2               |                        |                  |                      |                          |
| iPAE1160 | 1148 (808)   | 1496 (888)       | 1284 (643)         | 10            | No          | No      | FBA    | 25,000             | 25,000                 | 470              | 364                  | 16.8                     |
|          |              |                  |                    | 50            | No          | No      | FBA    | 25,000             | 25,000                 | 476              | 362                  | 17.1                     |
|          |              |                  |                    | 99            | No          | No      | FBA    | 25,000             | 25,000                 | 415              | 310                  | 16.9                     |
|          |              |                  |                    | 10            | Yes         | No      | FBA    | 25,000             | 24,997                 | 319              | 258                  | 14.8                     |
|          |              |                  |                    | 50            | Yes         | No      | FBA    | 25,000             | 24,999                 | 321              | 259                  | 14.6                     |
| iJO1366  | 1367 (1255)  | 2583 (2333)      | 1805 (1578)        | 10            | No          | No      | FBA    | 25,000             | 25,000                 | 607              | 814                  | 60.7                     |
|          |              |                  |                    | 50            | No          | No      | FBA    | 25,000             | 25,000                 | 510              | 719                  | 59.4                     |
|          |              |                  |                    | 99            | No          | No      | FBA    | 25,000             | 25,000                 | 363              | 381                  | 57.6                     |
| iLP844   | 887 (618)    | 1628 (816)       | 1518 (589)         | 10            | No          | No      | FBA    | 25,000             | 25,000                 | 340              | 303                  | 11.3                     |
|          |              |                  |                    | 50            | No          | No      | FBA    | 25,000             | 25,000                 | 337              | 300                  | 11.4                     |
|          |              |                  |                    | 99            | No          | No      | FBA    | 25,000             | 25,000                 | 304              | 263                  | 11.1                     |
| iMF721   | 723 (611)    | 1324 (921)       | 1134 (688)         | 10            | No          | No      | FBA    | 25,000             | 25,000                 | 329              | 397                  | 11.0                     |
|          |              |                  |                    | 50            | No          | No      | FBA    | 25,000             | 25,000                 | 338              | 399                  | 10.7                     |
|          |              |                  |                    | 99            | No          | No      | FBA    | 25,000             | 25,000                 | 300              | 361                  | 10.2                     |

488 \* The first set of numbers are based on the full starting model, while those in parentheses are based on the reduced model (following  
489 dead-end removal) that is used in the core model generation.

490 † Following 25,000 iterations, how many unique sets of genes or reactions were present in the core models.

491 ¥ Following 25,000 iterations, how many genes or reactions were found to be variably present or absent in the core models.

492 ø Length of time in seconds required to produce a single core model. Total running time is approximately equal to the run time per

493 iteration multiplied by the number of iterations and divided by the number of parallel pools used.



494

495

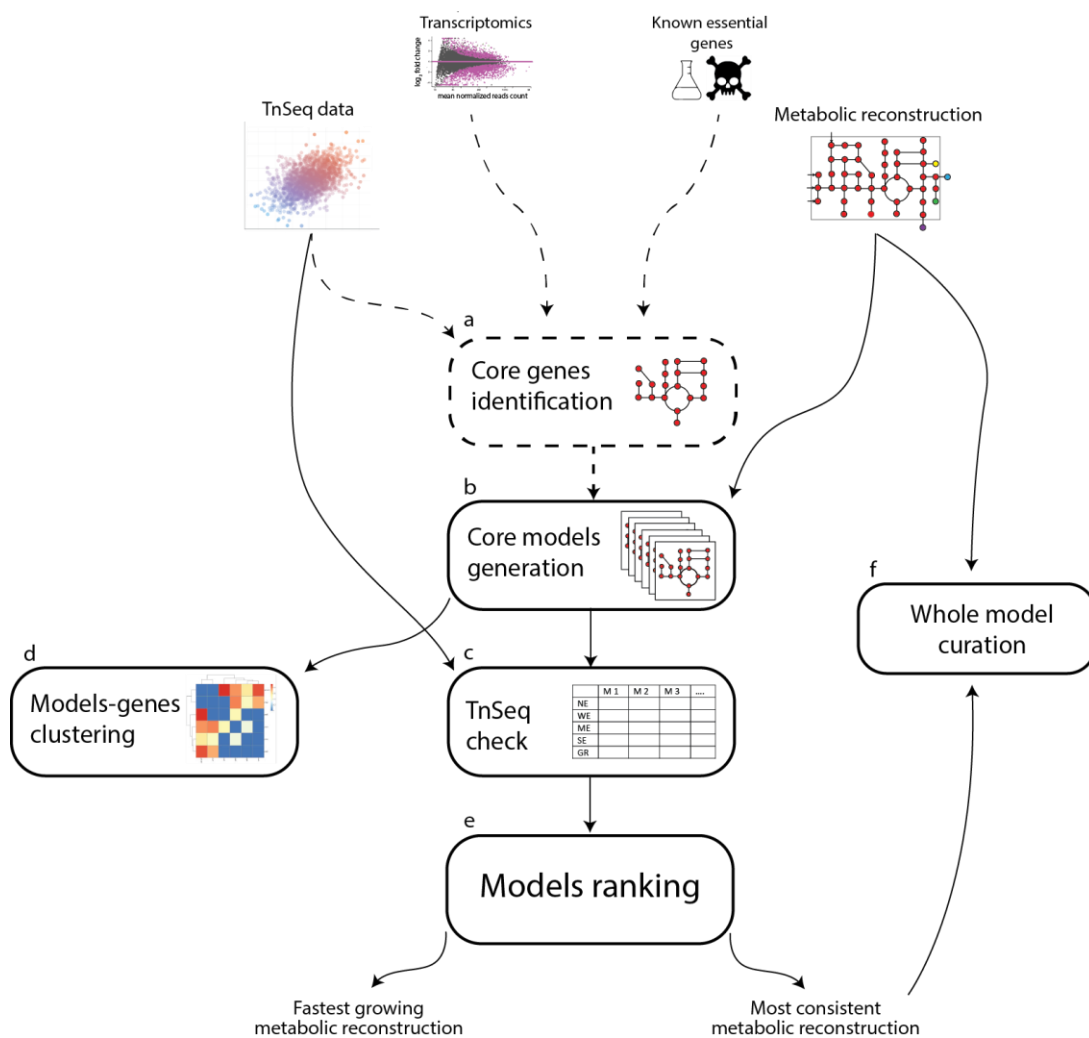

496

497

498

499

500 **Figure 1. Schematic representation of the Tn-Core pipeline.** Dashed lines represent optional  
501 steps.

502

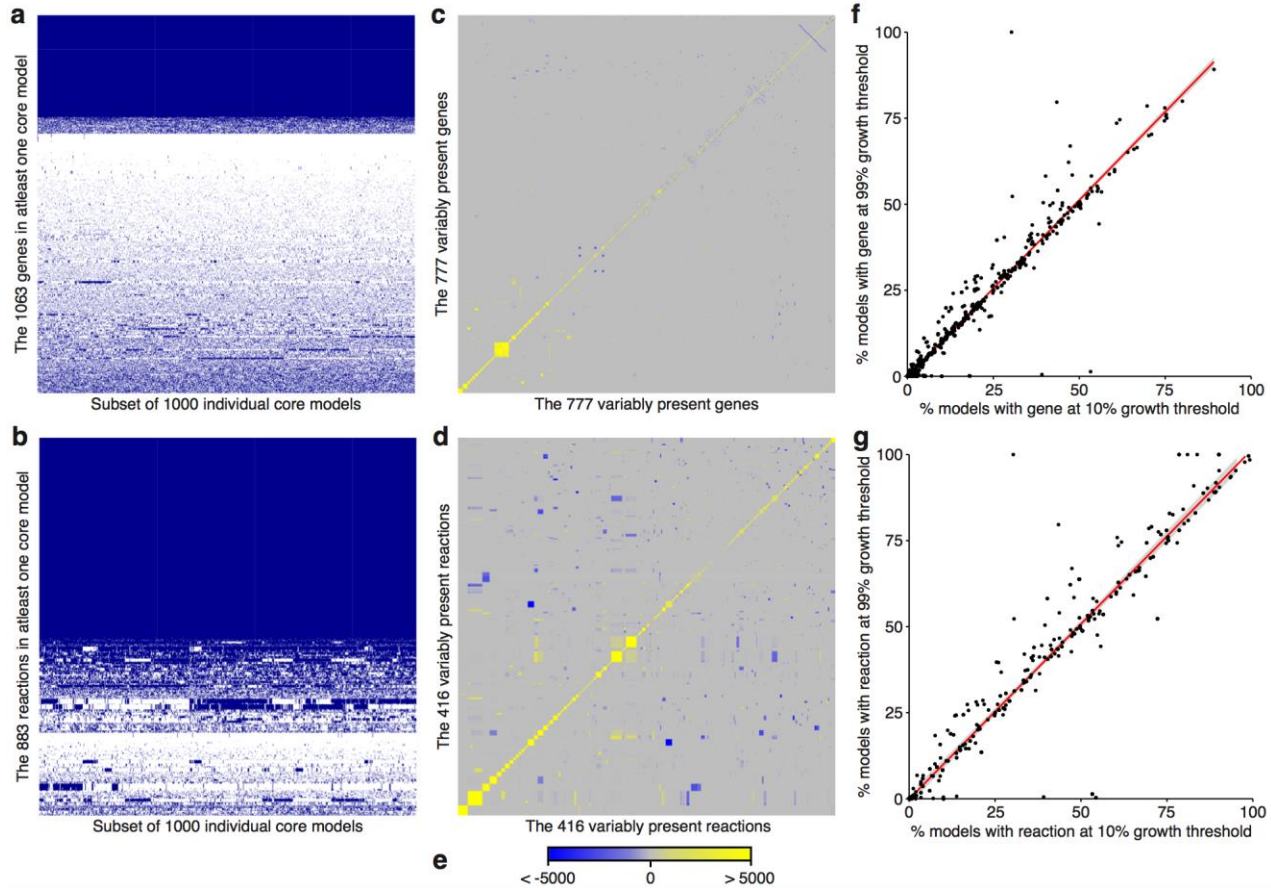

503

504 **Figure 2. Evaluation of core metabolic redundancy with Tn-Core.** The six primary matrixes  
505 generated by Tn-Core are shown. Tn-Core was run using the *S. meliloti* iGD1575 genome-scale  
506 metabolic reconstruction, with 25,000 iterations, a growth threshold of 10%, without essential  
507 gene pre-identified, and without RNA-seq data. Gene (a) and reaction (b) presence matrixes are  
508 shown for 1,000 of the randomly produced core models. Blue indicates the gene/reaction is  
509 present, white indicates the gene/reaction is absent. Gene (c) and reaction (d) co-occurrence  
510 matrixes are shown for the genes/reactions variably present in the 25,000 core models. (e) The  
511 legend for the co-occurrence matrixes is shown. The scale represent a Chi-squared statistic that  
512 summarizes if the gene or reaction pair is more (yellow) or less (blue) likely to occur in the same  
513 core model than by chance. Gene (f) and reaction (g) scatter plots displaying the correlation  
514 between the percentage of core models containing the gene/reaction when made using a growth  
515 threshold of 10% or 99%. Genes/reactions either present in all models or in no models are not  
516 included.

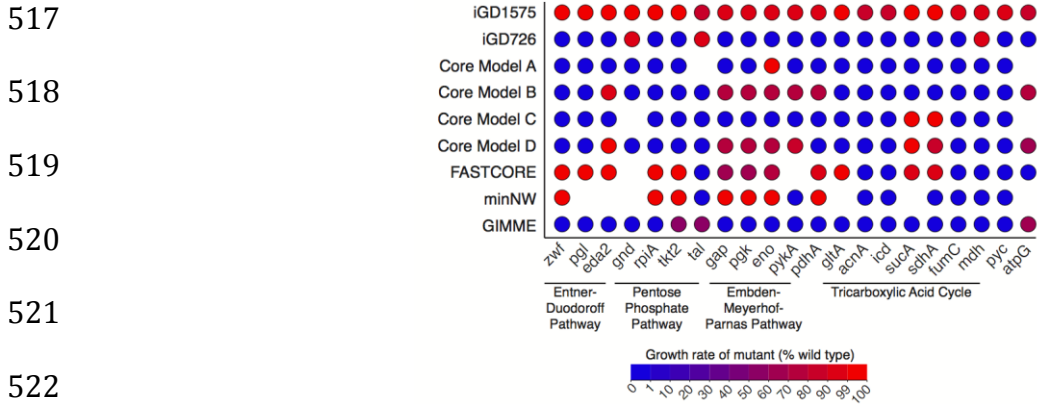

**Figure 3. Comparison of central carbon metabolism of full and core metabolic models.** This figure represents the full *S. meliloti* genome-scale metabolic reconstruction (iGD1575), the manually produced core metabolic reconstruction (iGD726), four core models produced from iGD1575 using Tn-Core (Core Model A [with Tn-seq, without RNA-seq, FBA algorithm], Core Model A [with Tn-seq, with RNA-seq, FBA algorithm], Core Model A [with Tn-seq, without RNA-seq, MOMA algorithm], Core Model A [with Tn-seq, with RNA-seq, MOMA algorithm]), and core models derived from iGD1575 using the FASTCORE, minNW, or GIMME algorithms. Representative genes from central carbon metabolism and the ATP synthase are shown. For each gene, a circle is shown if the gene is present in the model, and the circle is coloured according to the effect of deleting the gene on the growth rate of the model (determined using the MOMA algorithm); a value of 100 means no growth impact, a value of 0 means the gene deletion is lethal.
